# Supplementary material for: pH-Sensitive branched β-glucan-modified liposomes for activation of antigen presenting cells and induction of antitumor immunity
Source: Royal Society of Chemistry journal article supplement (doi:10.1039/d1tb00786f), 2021-01-01
Supplement: d1tb00786f1.pdf [file d1tb00786f1.pdf]

## Supplementary Information

### pH-Sensitive branched $\beta$ -glucan derivative-modified liposomes for activation of antigen presenting cells and induction of antitumor immunity

Shin Yanagihara, Nozomi Kasho, Koichi Sasaki, Naoto Shironaka, Yukiya Kitayama, Eiji

Yuba\*, Atsushi Harada\*

Department of Applied Chemistry, Graduate School of Engineering, Osaka Prefecture University, 1-1 Gakuen-cho, Naka-ku, Sakai, Osaka 5998531, Japan

\*Correspondence: yuba@chem.osakafu-u.ac.jp and harada@chem.osakafu-u.ac.jp

Tel.: +81-72-254-9330; Fax: +81-72-254-9330

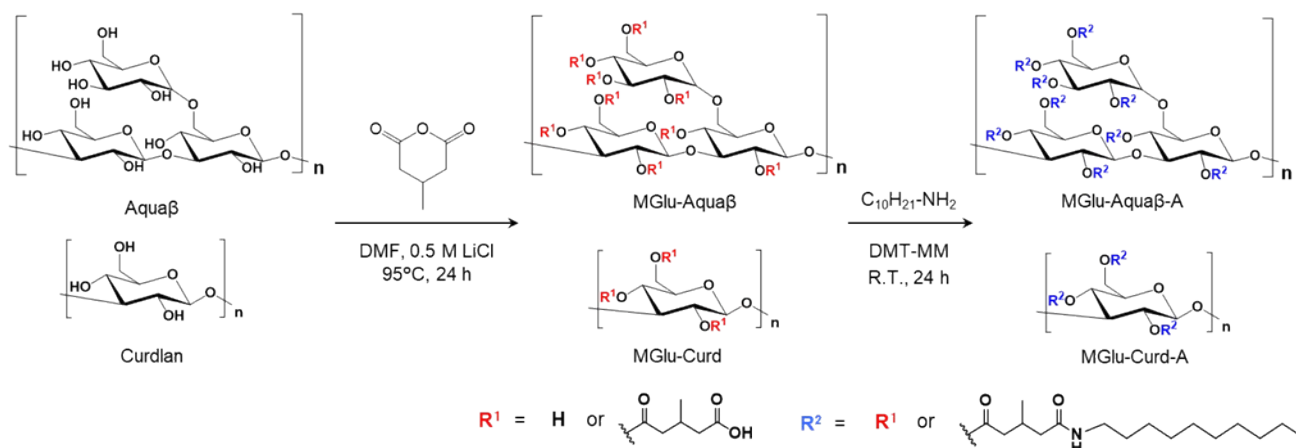

**Figure S1.** Synthetic route for  $\beta$ -glucan derivatives having carboxy groups and alkyl chains as anchor units to liposomal membrane.

**Table S1. Synthesis of  $\beta$ -Glucan Derivatives**

| Polymer                              | Aqua $\beta$ /g | DMF/mL | LiCl/g | 3-Methylglutaric |      | Yield |    | MGlu/%* | MGlu density** |
|--------------------------------------|-----------------|--------|--------|------------------|------|-------|----|---------|----------------|
|                                      |                 |        |        | anhydride        |      | /g    | /% |         |                |
|                                      |                 |        |        | /g               | eq.  |       |    |         |                |
| <b>MGlu75-Aqua<math>\beta</math></b> | 1.00            | 20     | 0.725  | 3.96             | 5.01 | 2.47  | 89 | 75      | 384.8          |
| <b>MGlu63-Aqua<math>\beta</math></b> | 1.00            | 20     | 0.726  | 3.12             | 3.95 | 1.51  | 61 | 63      | 323.2          |
| <b>MGlu43-Aqua<math>\beta</math></b> | 0.500           | 20     | 0.724  | 1.19             | 3.01 | 0.825 | 82 | 43      | 220.6          |
| <b>MGlu23-Aqua<math>\beta</math></b> | 0.500           | 20     | 0.725  | 0.788            | 2.02 | 0.507 | 66 | 23      | 118            |
| <b>MGlu76-Curd</b>                   | 0.298           | 15     | 0.316  | 1.87             | 7.94 | 0.675 | 77 | 76      | 228            |
| <b>MGlu61-Curd</b>                   | 0.508           | 15     | 0.500  | 2.58             | 6.43 | 0.851 | 69 | 61      | 183            |
| <b>MGlu46-Curd</b>                   | 0.301           | 15     | 0.787  | 2.27             | 9.54 | 0.495 | 78 | 46      | 138            |
| <b>MGlu19-Curd</b>                   | 0.302           | 15     | 0.786  | 0.725            | 3.04 | 0.34  | 76 | 19      | 57             |

\*Determined by  $^1\text{H}$  NMR.

\*\*MGlu density is defined as the number of MGlu units per 100  $\beta$ 1,3-linked sugar units. In the case of Aqua $\beta$ , total sugar units per 100  $\beta$ 1,3-linked sugar main chain units are calculated as 171 from its degree of branching (0.71).

**Table S2. Synthesis of  $\beta$ -Glucan Derivatives Having Anchor Moieties**

| Polymer                                 | MGlu-Aqua $\beta$ or<br>MGlu-Curd /g | Decylamine/<br>mg | DMT-<br>MM<br>/mg | Yield |     | MGlu<br>/%* | Anchor<br>/%* | MGlu<br>density** | Anchor<br>density** |
|-----------------------------------------|--------------------------------------|-------------------|-------------------|-------|-----|-------------|---------------|-------------------|---------------------|
|                                         |                                      |                   |                   | /g    | /%  |             |               |                   |                     |
| <b>MGlu70-Aqua<math>\beta</math>-A6</b> | 1.00                                 | 94.2              | 167               | 0.922 | 87  | 70          | 6             | 359.1             | 30.8                |
| <b>MGlu56-Aqua<math>\beta</math>-A4</b> | 1.01                                 | 98.1              | 174               | 0.979 | 95  | 56          | 4             | 287.3             | 20.5                |
| <b>MGlu38-Aqua<math>\beta</math>-A3</b> | 0.408                                | 33.0              | 59.5              | 0.165 | 40  | 38          | 3             | 194.9             | 15.4                |
| <b>MGlu21-Aqua<math>\beta</math>-A2</b> | 0.210                                | 16.4              | 21.3              | 0.108 | 50  | 21          | 2             | 107.7             | 10.3                |
| <b>MGlu71-Curd-A6</b>                   | 0.144                                | 28.3              | 50.3              | 0.139 | 90  | 71          | 6             | 213               | 18                  |
| <b>MGlu62-Curd-A4</b>                   | 0.403                                | 41.4              | 78.4              | 0.379 | 85  | 62          | 4             | 186               | 12                  |
| <b>MGlu37-Curd-A4</b>                   | 0.250                                | 32.3              | 50.4              | 0.265 | 108 | 37          | 4             | 111               | 12                  |
| <b>MGlu13-Curd-A4</b>                   | 0.150                                | 28.5              | 47.7              | 0.162 | 106 | 13          | 4             | 39                | 12                  |

\*Determined by  $^1\text{H}$  NMR.

\*\*MGlu and anchor densities are defined as the number of MGlu and anchor units per 100  $\beta$ 1,3-linked sugar units, respectively. In the case of Aqua $\beta$ , total sugar units per 100  $\beta$ 1,3-linked sugar main chain units are calculated as 171 from its degree of branching (0.71).



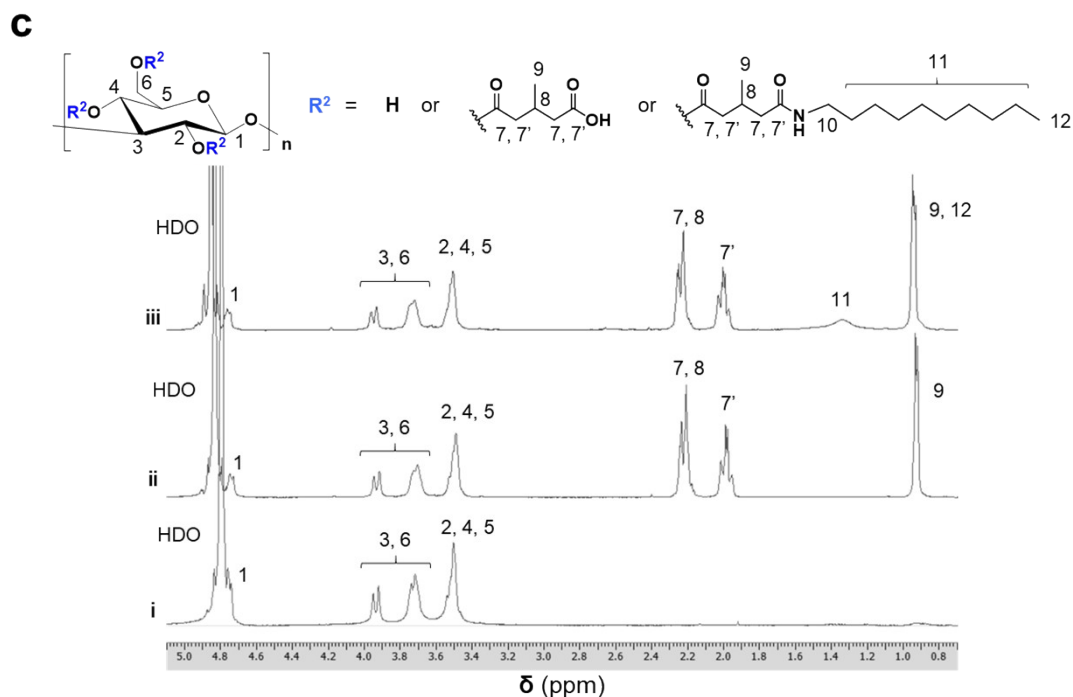

**Figure S2.** (a)  $^1\text{H}$  NMR spectra of (i) MGLu46-Curd, (ii) MGLu37-Curd-A4, (iii) MGLu43-Aqua $\beta$ , and (iv) MGLu38-Aqua $\beta$ -A3 in  $\text{D}_2\text{O}$ . (b)  $^1\text{H}$  NMR spectra of (i) Aqua $\beta$ , (ii) hydrolyzed MGLu43-Aqua $\beta$  and (iii) hydrolyzed MGLu38-Aqua $\beta$ -A3, and (c)  $^1\text{H}$  NMR spectra of (i) Curdlan, (ii) hydrolyzed MGLu46-Curd and (iii) hydrolyzed MGLu37-Curd-A4 in  $\text{D}_2\text{O}/\text{NaOD}$ , with assigned signals.

**Table S3.** The peak integration values of Aqua $\beta$ , MGLu43-Aqua $\beta$  and MGLu38-Aqua $\beta$ -A3 (Fig. S2b).

| Peak signals                                  | 1'   | 2-6, 2'-6' | 7, 8 | 7'   | 11   | 9, 12 |
|-----------------------------------------------|------|------------|------|------|------|-------|
| <b>i (Aqua<math>\beta</math>)</b>             | 0.37 | 6.00       | -    | -    | -    | -     |
| <b>ii (MGLu43-Aqua<math>\beta</math>)</b>     | 0.37 | 6.00       | 3.85 | 2.55 | -    | 3.87  |
| <b>iii (MGLu38-Aqua<math>\beta</math>-A3)</b> | 0.37 | 6.00       | 3.66 | 2.44 | 1.51 | 3.96  |

**Table S4.** The peak integration values of Curdlan, MGLu46-Curd and MGLu37-Curd-A4 (Fig. S2c).

| Peak signals                | 3, 6 | 2, 4, 5 | 7, 8 | 7'   | 11   | 9, 12 |
|-----------------------------|------|---------|------|------|------|-------|
| <b>i (Curdlan)</b>          | 3.00 | 2.59    | -    | -    | -    | -     |
| <b>ii (MGLu46-Curd)</b>     | 3.00 | 2.90    | 4.02 | 2.67 | -    | 3.97  |
| <b>iii (MGLu37-Curd-A4)</b> | 3.00 | 2.98    | 3.75 | 2.55 | 1.85 | 4.14  |

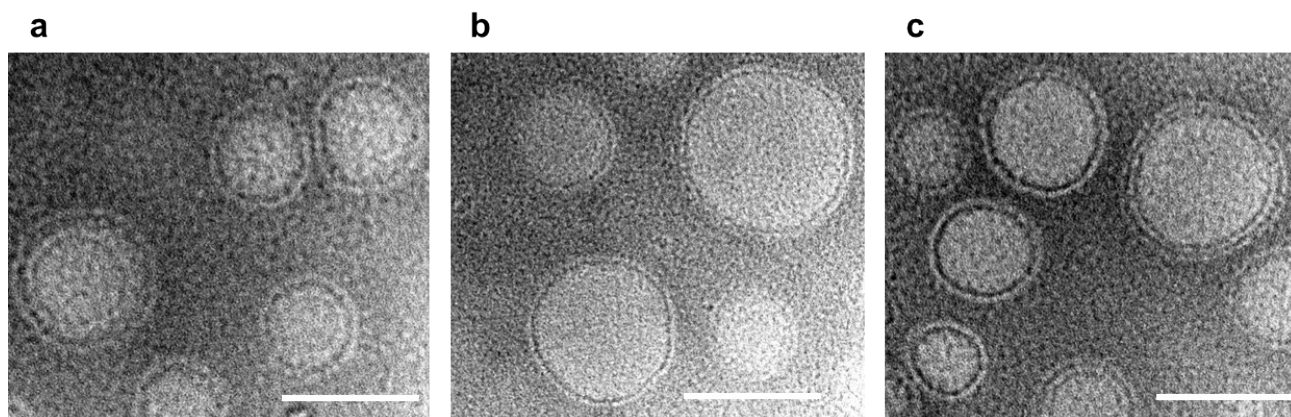

**Figure S3.** Transmission electron microscopic (TEM) analysis of liposomes modified with (a) MGlu70-Aqua $\beta$ -A6, (b) MGlu71-Curd-A6 and (c) unmodified liposomes. Scale bars represent 100 nm.

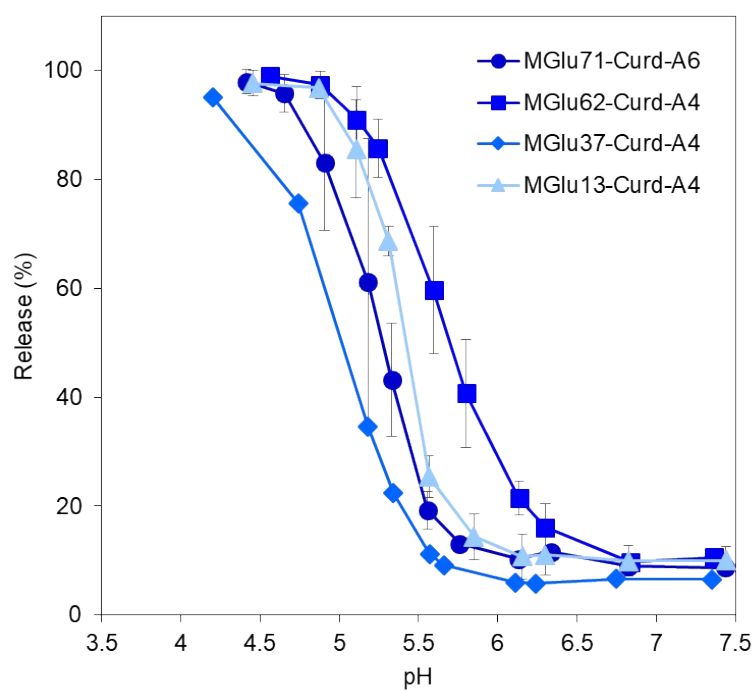

**Figure S4.** pH-Dependence of pyranine release from liposomes modified with curdlan derivatives after 30 min incubation are shown. Lipid concentration was  $2.0 \times 10^{-5}$  M. Each point is the mean  $\pm$  SD ( $n = 3$ ).

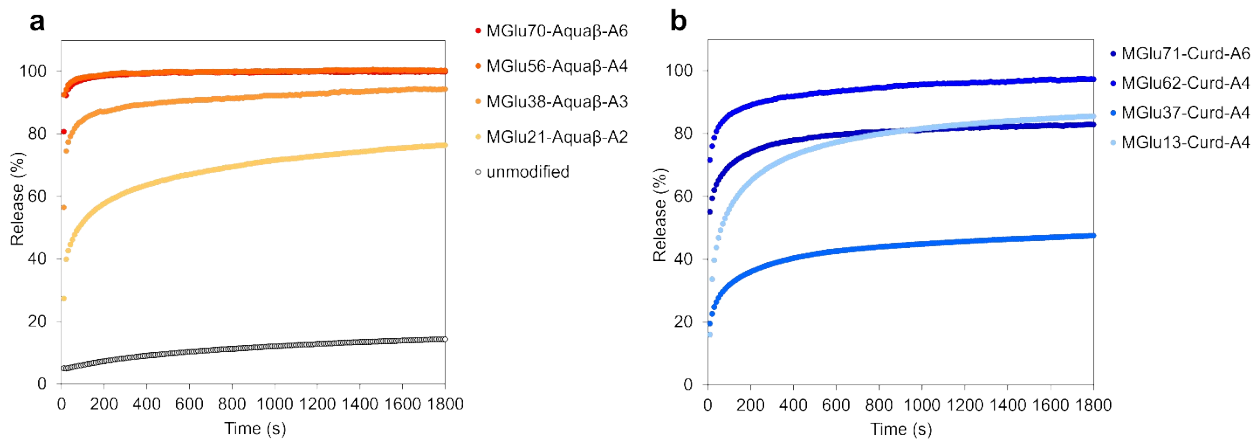

**Figure S5.** Time-courses of pyranine release from (a) Aquaβ derivative-modified liposomes and unmodified liposomes, and (b) curdlan derivative-modified liposomes at pH 5.

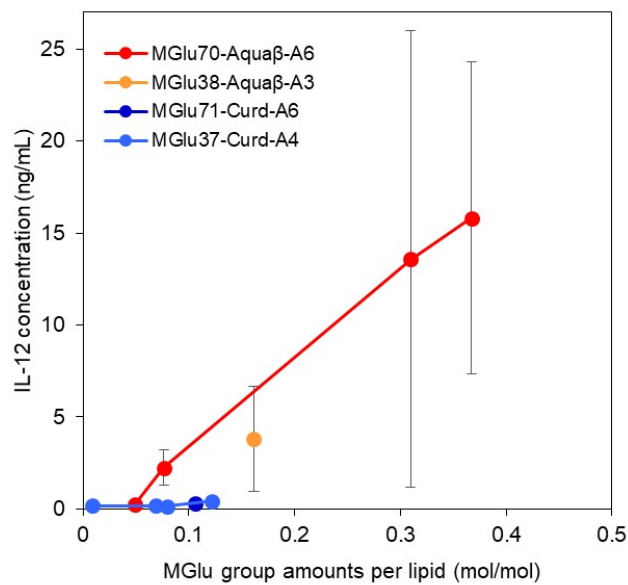

**Figure S6.** Correlation of IL-12 production with MGLu group amounts of β-glucan derivatives on liposomes. MGLu group amounts of β-glucan derivatives on the liposomes were calculated from MGLu% of each β-glucan derivative and its modification amount on the liposomes.

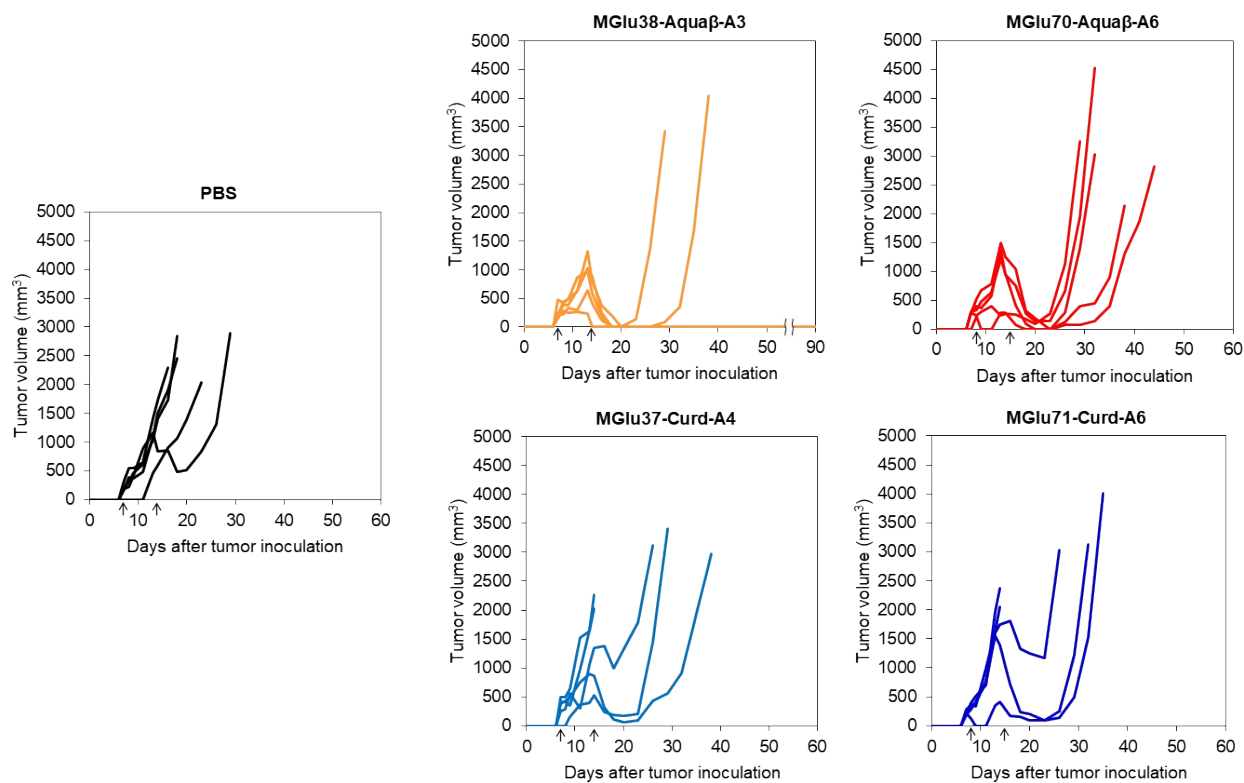

**Figure S7.** Individual tumor volume change of C57BL/6 mice treated with PBS or liposomes modified with various  $\beta$ -glucan derivatives in Fig. 6. Arrows indicate the sample injection.

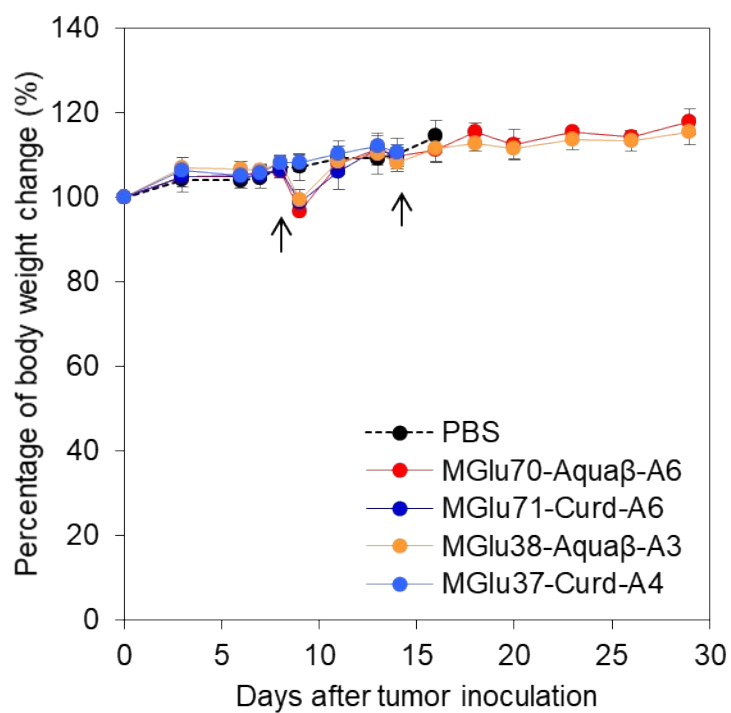

**Figure S8.** Relative body weight change of mice in Fig. 6. Arrows indicate the sample injection.



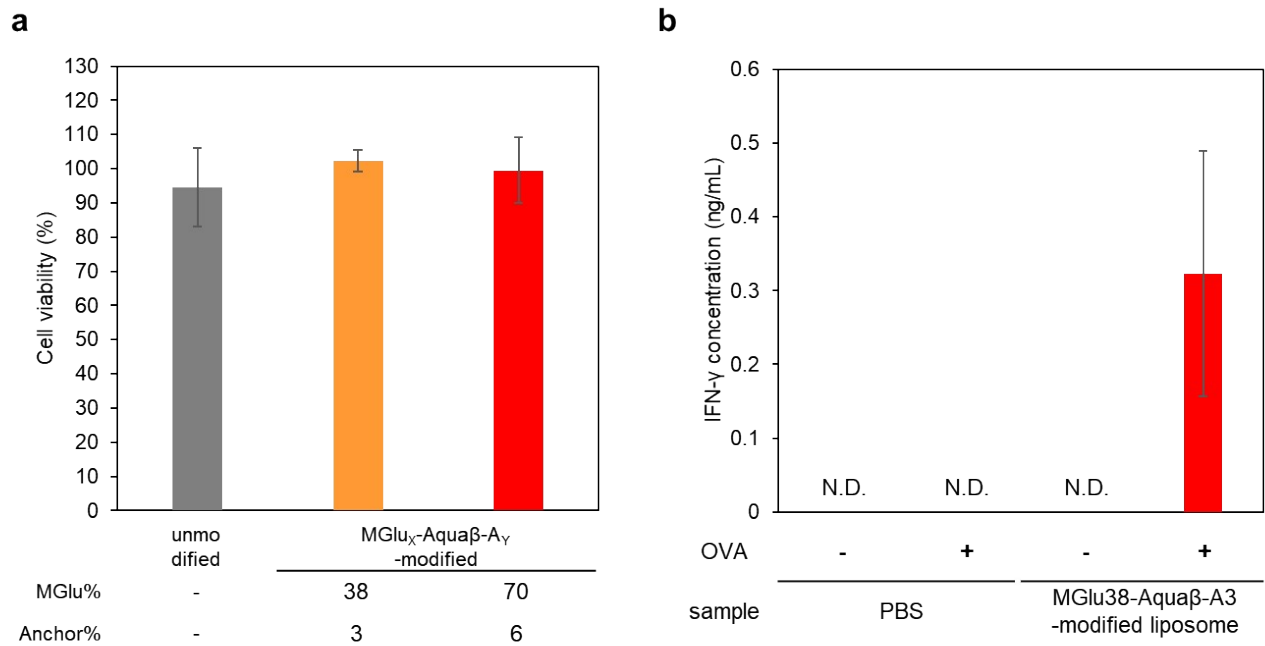

**Figure S9.** (a) Cell viability of NIH3T3 cells treated with various liposomes (0.2 mM) for 24 h in the presence of 10% FBS. (b) *In vitro* stimulation of splenocytes from mice immunized with PBS or OVA-loaded liposomes. Splenocytes ( $2 \times 10^6/2$  mL) isolated from immunized C57BL/6 mice were incubated with or without 50  $\mu\text{g/mL}$  of OVA for 4 days. IFN- $\gamma$  secretion in the supernatant was detected by ELISA. Splenocytes were collected at 6 days after the immunizations.

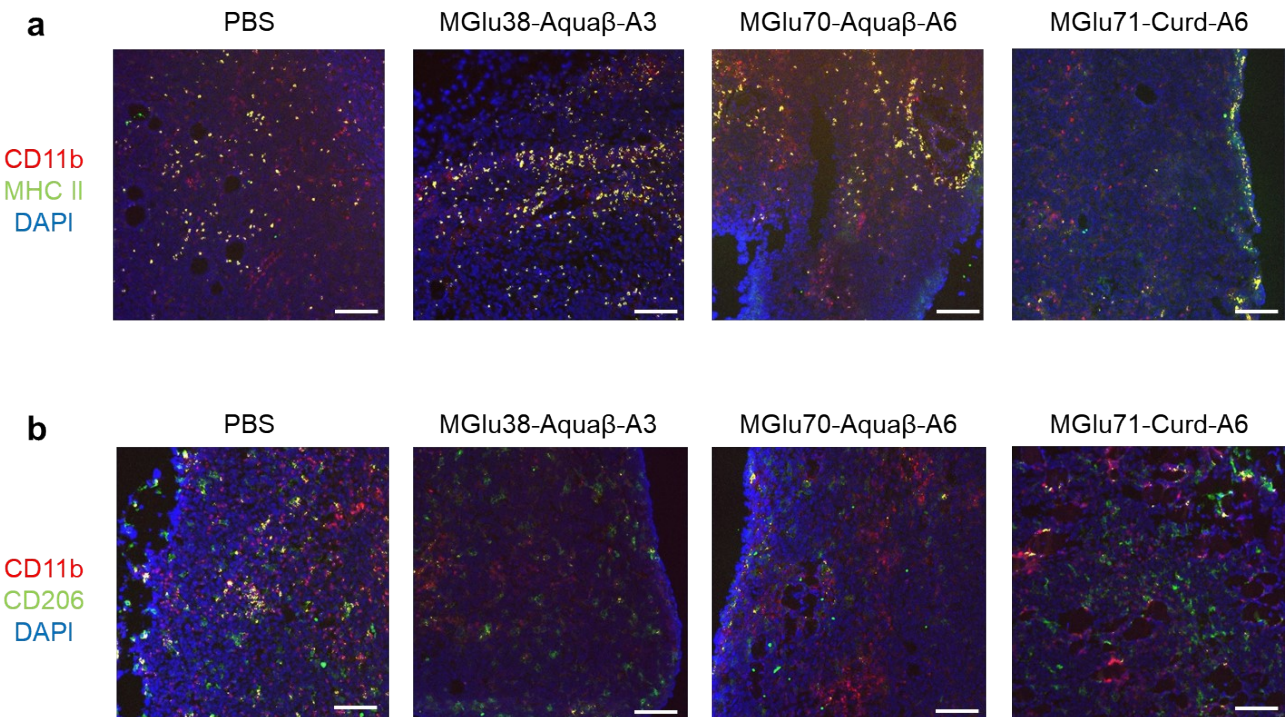

**Figure S10.** Fluorescence images of tumor sections from the mice immunized with PBS, MGLu38-



Aqua $\beta$ -A3-modified liposomes, MGlu70-Aqua $\beta$ -A6-modified liposomes and MGlu71-Curd-A6-modified liposomes. Tumor tissues were excised on Day 6 after immunization. Tumor sections were immunohistochemically stained with (a) PE-labeled anti-CD11b (M1/70) and FITC-labeled anti-MHC II (AF6-120.1) and (b) PE-labeled anti-CD11b (M1/70) and Alexa488-labeled CD206 (C068C2). Cell nucleus was also labeled with DAPI. Yellow colors indicate colocalization of green and red fluorescence: M1 macrophages (a) or M2 macrophages (b) in the tumor section. Scale bars represent 100  $\mu$ m.
